# Supplementary material for: High-performance Hg2+ removal from ultra-low-concentration aqueous solution using both acylamide- and hydroxyl-functionalized metal–organic framework
Source: Royal Society of Chemistry journal article supplement (doi:10.1039/c5ta01669j), 2015-01-01
Supplement: c5ta01669j1.pdf [file c5ta01669j1.pdf]

# High-performance $\text{Hg}^{2+}$ removal from ultra-low-concentration aqueous solution using both acylamide- and hydroxyl-functionalized metal-organic framework

Feng Luo,\* Jing Li Cheng, Li Long Dang, Wei Na Zhou, Hai Lv Lin, Jiang Qiang Li, Shu Juan Liu, and Ming Biao Luo

**Table S1** Adsorption isotherm constants for  $\text{Hg}^{2+}$  onto MOF material.

| Langmuir isotherm  |                    |        | Freundlich isotherm |       |       |
|--------------------|--------------------|--------|---------------------|-------|-------|
| $q_{max}$          | $K_L$              | $R^2$  | $K_F$               | $1/n$ | $R^2$ |
| $\text{mg g}^{-1}$ | $\text{mg L}^{-1}$ |        | $\text{mg g}^{-1}$  |       |       |
| 333.33             | 2.776              | 0.9145 | 71.593              | 0.671 | 0.816 |

**Table S2** Thermodynamic parameters for sorption of  $\text{Hg}^{2+}$ .

| $\Delta H^0$ ( $\text{kJ mol}^{-1} \text{ k}^{-1}$ ) | $\Delta S^0$ ( $\text{J mol}^{-1} \text{ k}^{-1}$ ) | $\Delta G^0$ ( $\text{kJ mol}^{-1}$ ) |        |        |
|------------------------------------------------------|-----------------------------------------------------|---------------------------------------|--------|--------|
|                                                      |                                                     | 298.15                                | 308.15 | 318.15 |
| -3.93                                                | 67.33                                               | -24.01                                | -24.68 | -25.35 |

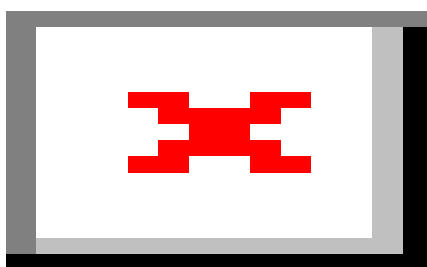

**Fig. S1** PXRD patterns simulated from single crystal data, of synthesized samples and  $\text{Hg}^{2+}$  loaded samples.

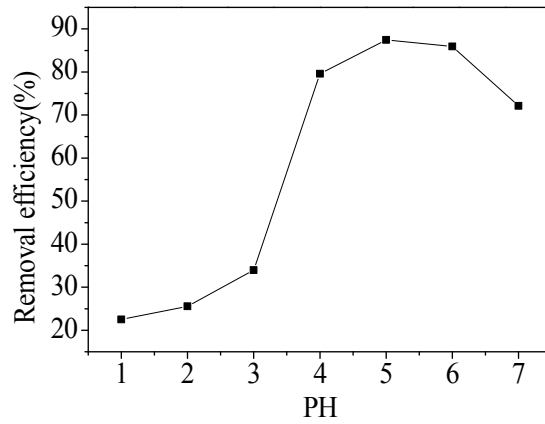

**Fig. S2** pH effect on the adsorption of  $\text{Hg}^{2+}$  ( $C_0(\text{Hg}^{2+})=100$  ppb,  $v=40$  mL,  $m(\text{adsorbent})=2$  mg,  $T=25^\circ\text{C}$ ,  $t=2$  h).

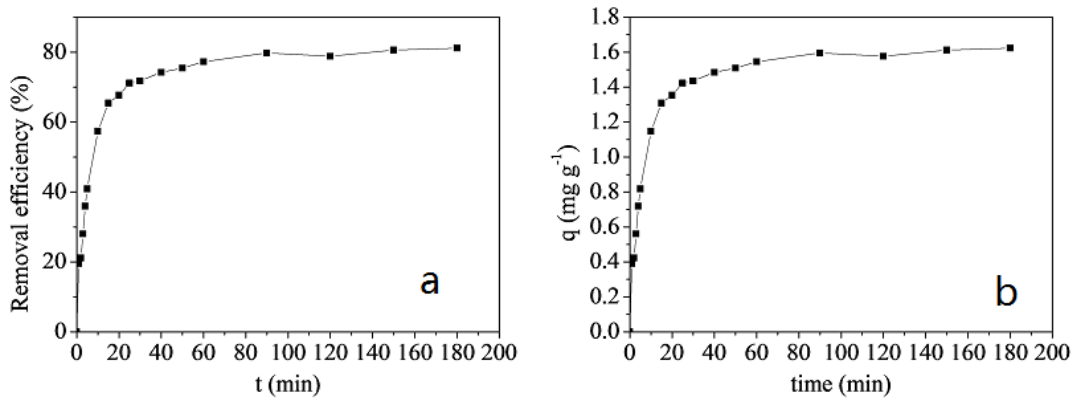

**Fig. S3** Effect of contact time on  $\text{Hg}(\text{II})$  removal ( $C_0(\text{Hg}^{2+})=100$  ppb,  $v=40$  mL,  $m(\text{adsorbent})=2$  mg,  $T=25^\circ\text{C}$ ,  $\text{pH}=5$ )

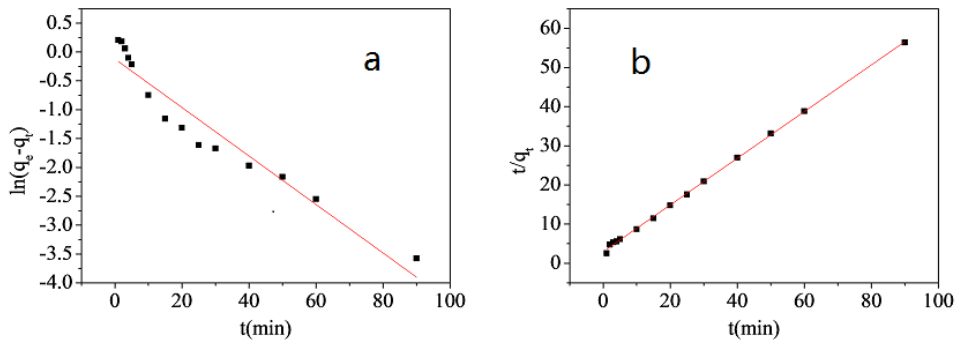

**Fig. S4** Pseudo-first-order kinetic plot (a) and pseudo-second-order kinetic plot (b) for the adsorption of  $\text{Hg}(\text{II})$  onto adsorbent.

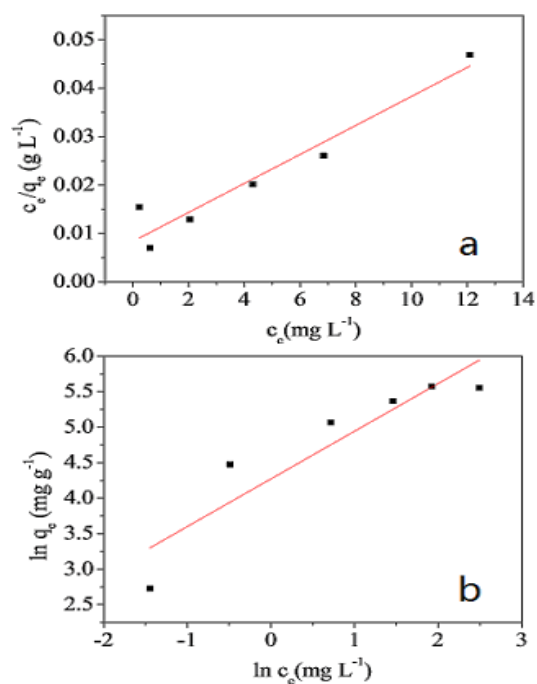

**Fig. S5** Adsorption isotherms fitted by the Langmuir (a) and Freundlich (b) models ( $c^0(\text{Hg}^{2+})=100$  ppb,  $v=40$  mL,  $m(\text{adsorbent})=2$  mg,  $T=25^\circ\text{C}$ ,  $t=1$  h).

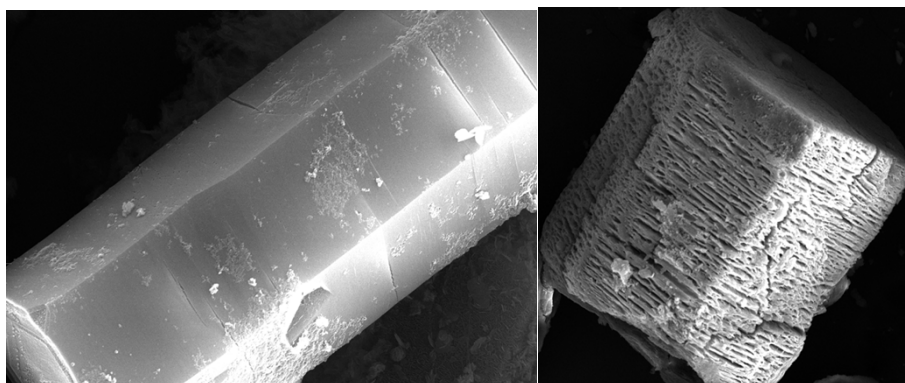

**Fig. S6** The TEM image of the MOF material before and after the adsorption of Hg(II).

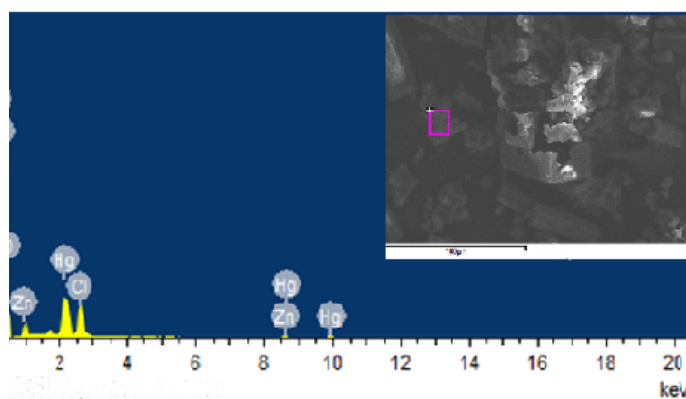

**Fig. S7** SEM and EXD spectra of the MOF material after loading Hg<sup>2+</sup>.

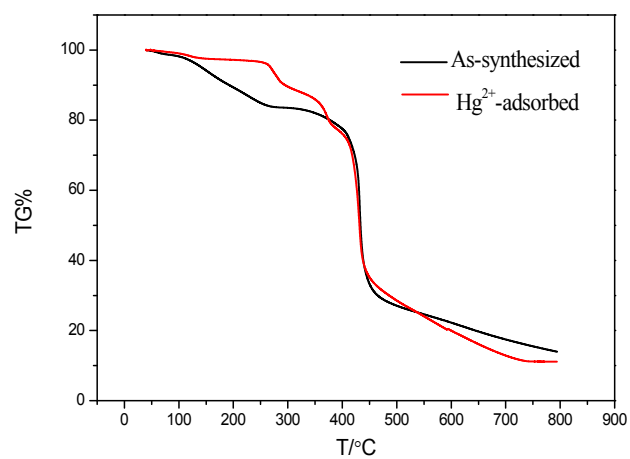

**Fig. S8** TG curves of as-synthesized and Hg<sup>2+</sup>-adsorbed MOF sample.
